# Supplementary material for: Spin-Coated vs. Electrodeposited Mn Oxide Films as Water Oxidation Catalysts
Source: MDPI journal article supplement (doi:10.3390/ma9040296), 2016-04-19
Supplement: s1 [file s1]

## Supplementary Materials: Spin-Coated *vs.* Electrodeposited Mn Oxide Films as Water Oxidation Catalysts

Simelys Hernández, Carminna Ottone, Sara Varetto, Marco Fontana, Diego Pugliese, Guido Saracco, Barbara Bonelli and Marco Armandi

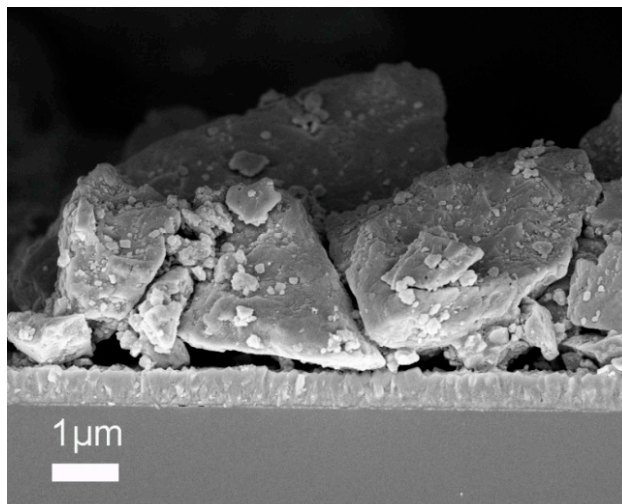

Figure S1. Cross-section FE-SEM image of a spin-coated film made with a non-ball-milled  $\text{Mn}_2\text{O}_3$  powder.

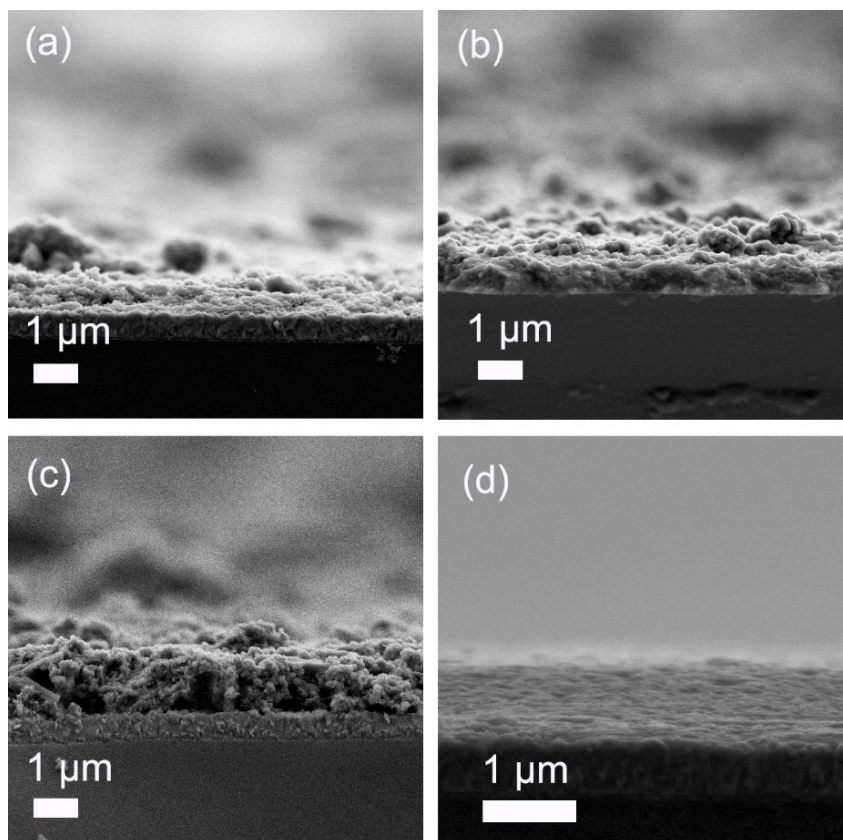

Figure S2. FE-SEM cross-section images of the films prepared by spin-coating of  $\text{MnO}_2$  (a);  $\text{Mn}_2\text{O}_3$  (b) and  $\text{Mn}_3\text{O}_4$  (c) powders; as-made electrodeposited 5-min film (d).

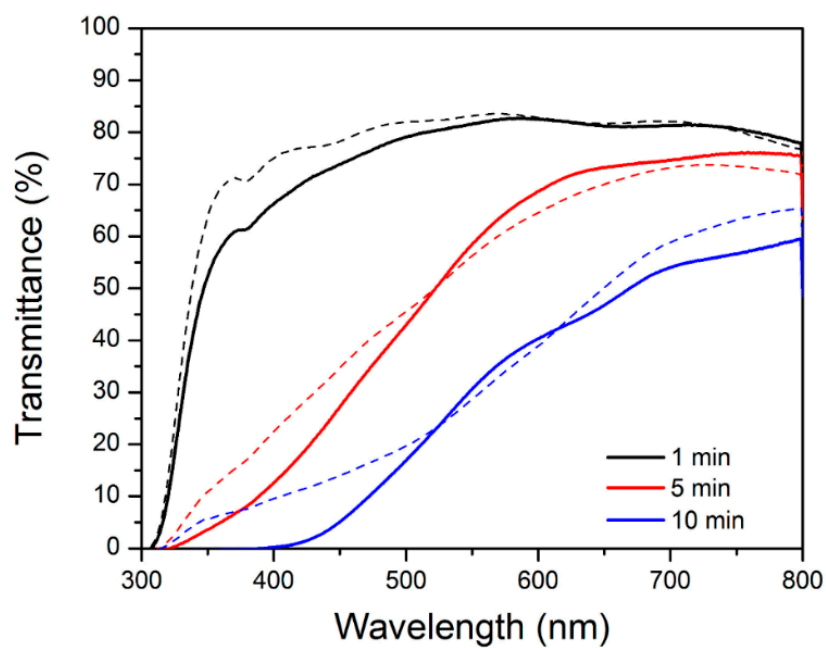

**Figure S3.** UV-Vis transmittance spectra of the electrodeposited films: as-made (continuous line) and calcined at 500 °C (dotted line).

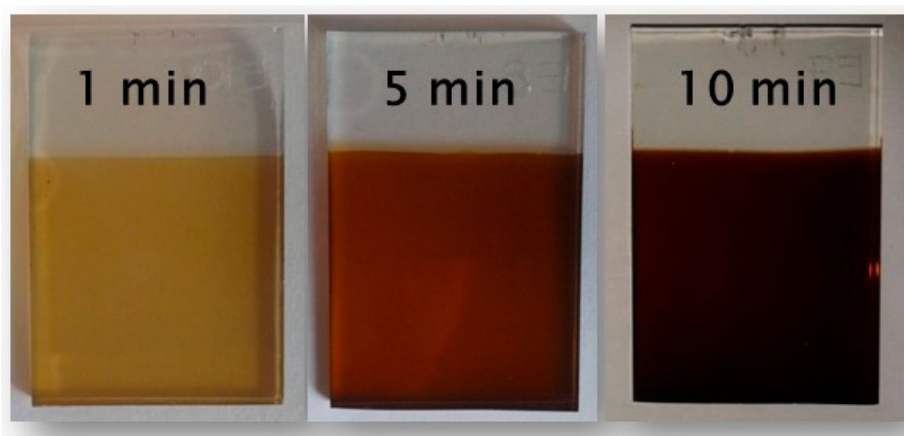

**Figure S4.** Photographs of the as-made films prepared by electrodeposition at different deposition times.

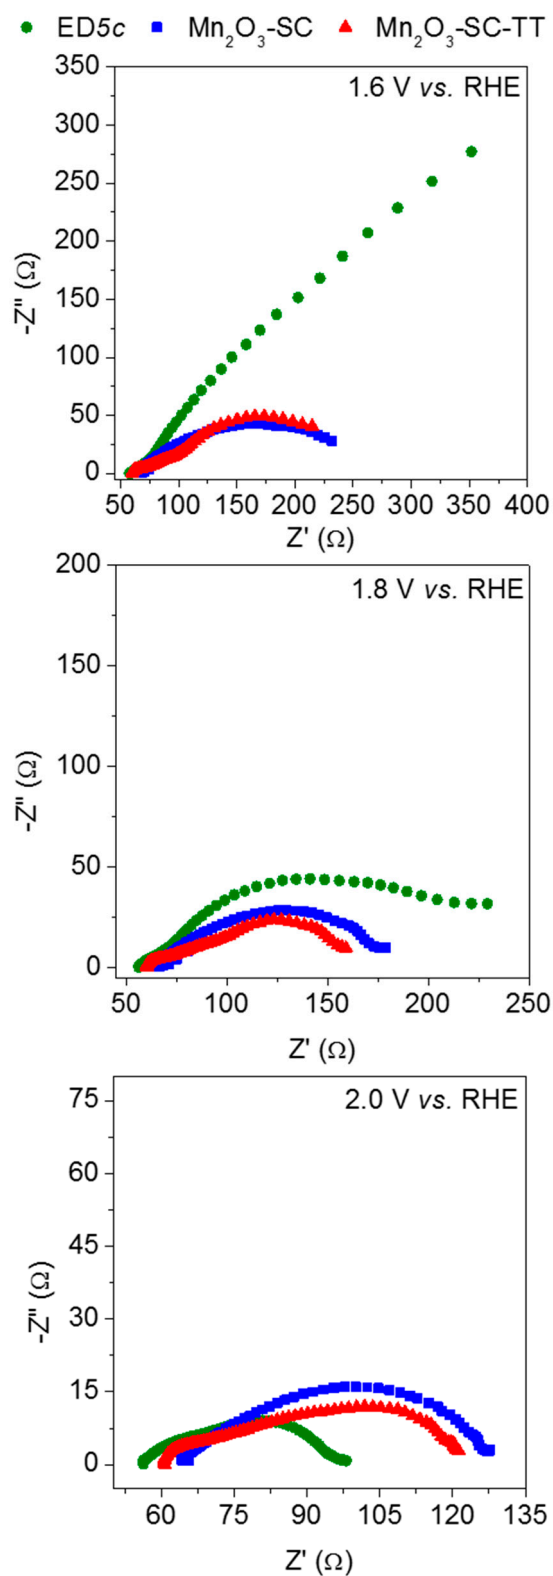

**Figure S5.** Nyquist plots of the EIS measurements acquired using the  $\alpha$ -Mn<sub>2</sub>O<sub>3</sub>-based electrodes at 1.6, 1.8 and 2.0 V vs. RHE.
